# Supplementary material
Source: PubMed Central journal article supplement (PMC6317068)

## Supplementary Figure Legends

**Figure S1. Characterization of HGPS markers in the inducible GFP-progerin fibroblast cell system.** Representative immunofluorescence staining of GFP-progerin, Lamin B1, LAP2, HP1 $\gamma$ , H3-K27-3M,  $\gamma$ H2AX, 53BP1 in GFP-progerin inducible skin fibroblasts in which progerin remained uninduced (OFF) or was induced for 4 days by doxycycline (ON). Scale bar: 10  $\mu$ M.

**Figure S2. Dose response curves for primary screening hits in GFP-progerin inducible fibroblasts.** Dose-response curves from compounds of the primary screen that fall into the categories of corticoids (**A**), PDE inhibitors and adrenergic agonists (**B**), and various pathways (**C**) indicating the effect for 1, 3, 10, and 29  $\mu$ M of compound treatment on the induction of GFP-progerin and the formation of aging defects in Lamin B1, and  $\gamma$ H2AX in GFP-progerin inducible fibroblasts. Positive and negative control levels for all aging markers are indicated by dotted lines in green and red, respectively. Values represent averages  $\pm$  SD from 3 experiments.

**Figure S3. Quantification of the effect of retinoids on HGPS markers in HGPS patient cells.** Quantification of immunofluorescence staining (See Material and Methods) for progerin, Lamin B1, LAP2, HP1 $\gamma$ , H3-K27-3M,  $\gamma$ H2AX, 53BP1 in HGPS patient fibroblast upon treatment with the retinoic acid receptor (RAR) agonists isotretinoin, tamibarotene and tazarotene, or the pan-RAR antagonist BMS493at indicated concentrations (Range: 1nM-10 $\mu$ M). \* $p$ <0.05; significant improvement of marker in compound treated vs. untreated HGPS patient cells. #  $p$ <0.05; significant worsening of marker in compound treated vs. untreated HGPS patient cells. Values represent averages  $\pm$  SD from 3 experiments.

**Figure S4. Quantification of the effect of retinoids on lamin protein ratios in HGPS patient cells.** Quantification of the effect of 10 $\mu$ M of isotretinoin, tamibarotene or tazarotene retinoid treatment of HGPS dermal fibroblasts on the ratios of lamin A, lamin C and progerin protein

levels as depicted in the western blot of Figure 5C. Values represent averages  $\pm$  SD from 3 experiments. All determined ratios were non-significant (n.s. ;  $p>0.05$ ) in treated vs. untreated HGPS patient fibroblasts. Values represent averages  $\pm$  SD from 3 experiments.

**Figure S1**

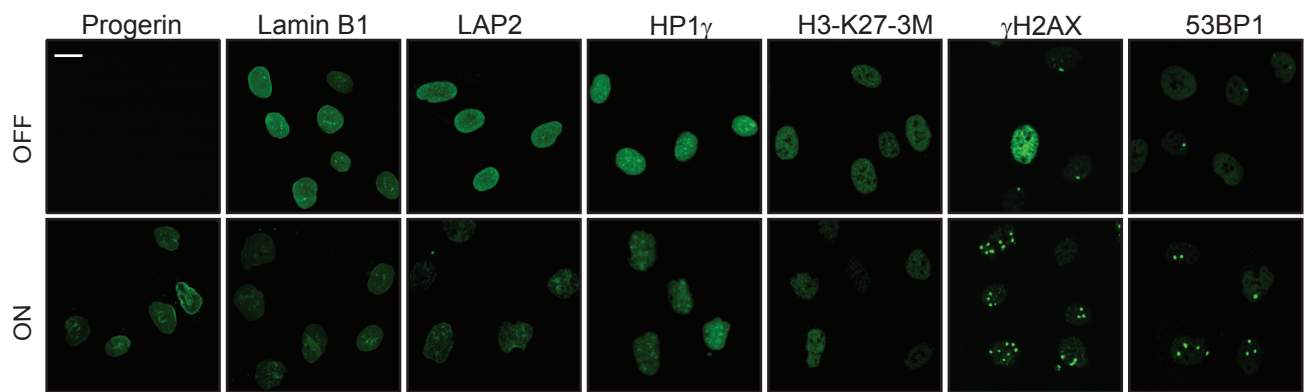

# Figure S2

**A**

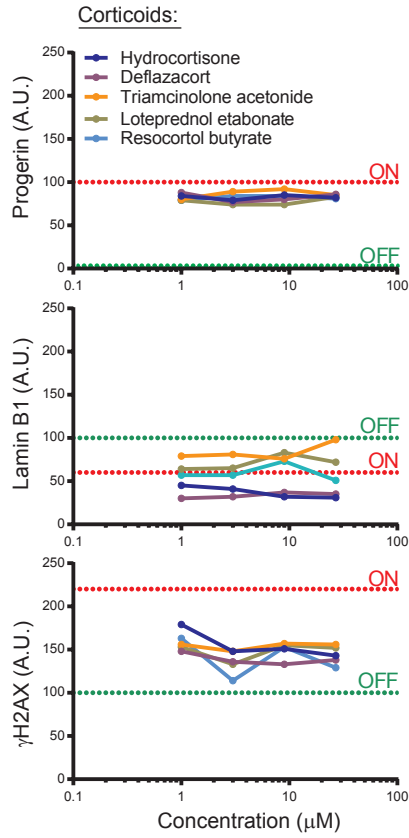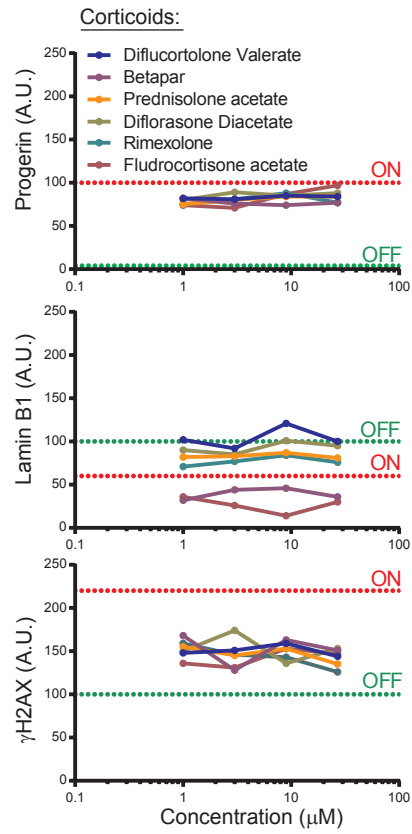

**B**

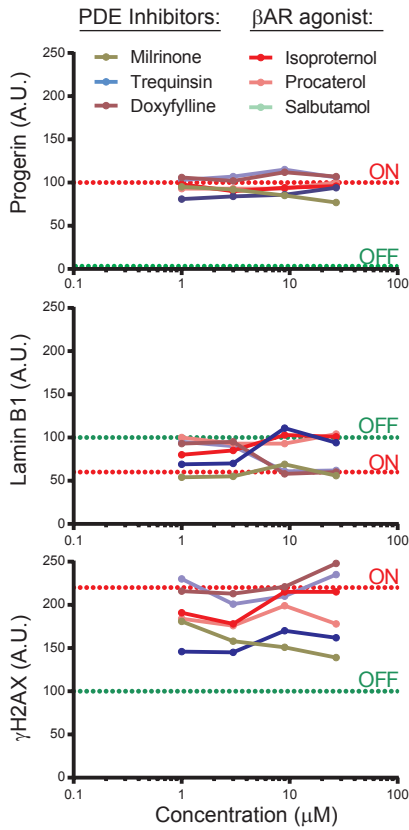

**C**

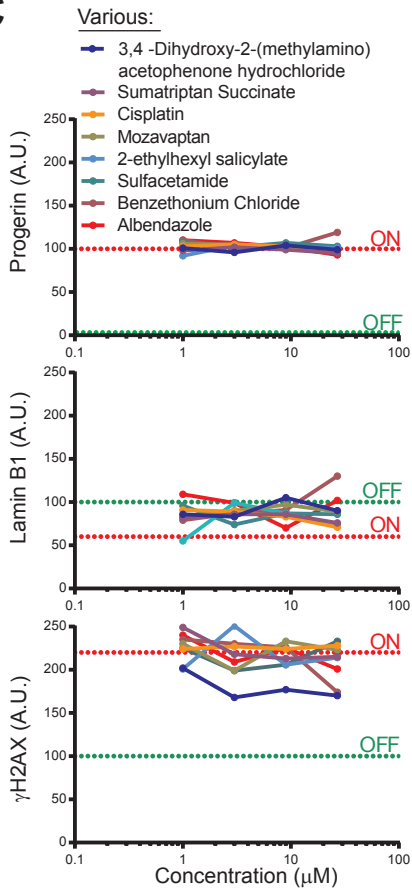

# Figure S3

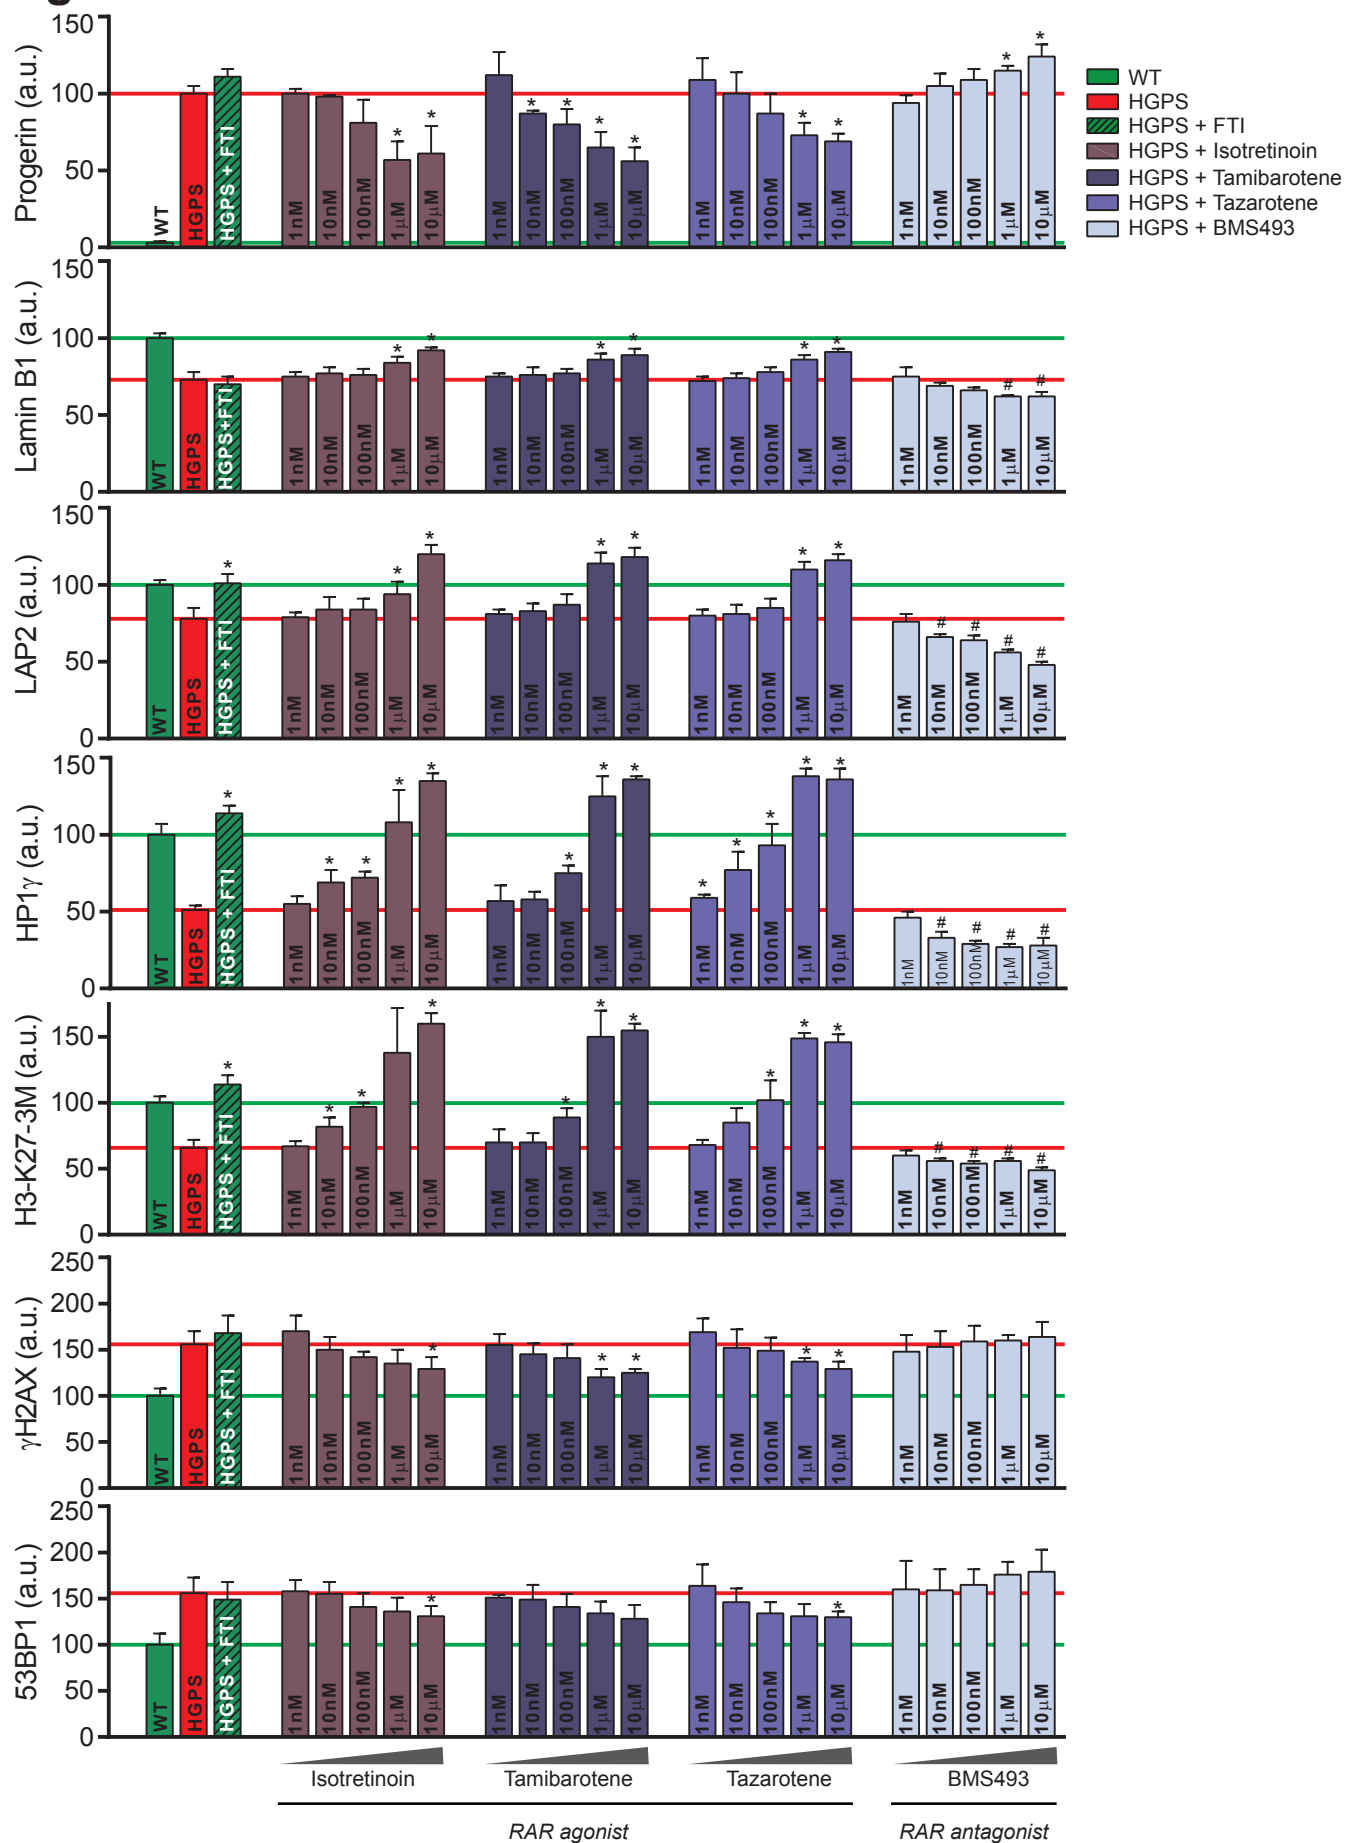

# Figure S4

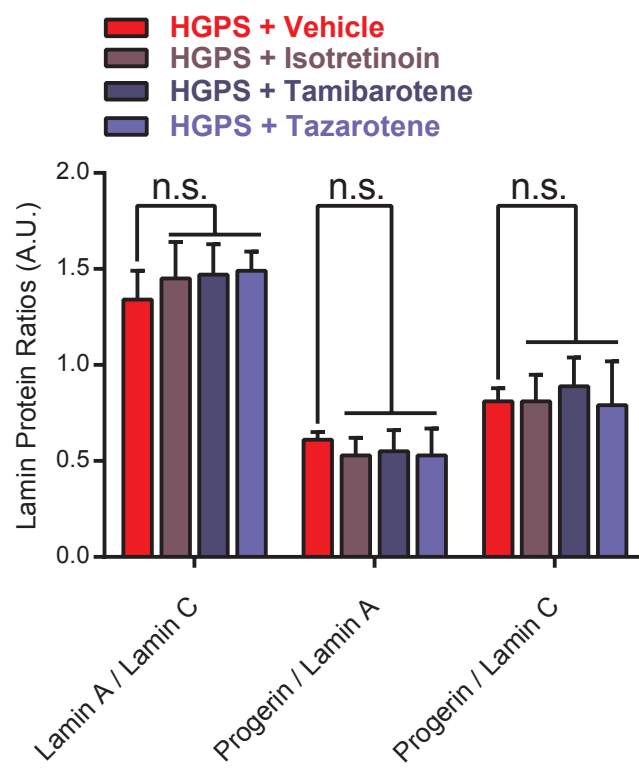

Supplement: NIHMS999234-supplement-Supplementary_Materials.pdf [file NIHMS999234-supplement-Supplementary_Materials.pdf]
